# Supplementary material for: Effectiveness of Coenzyme Q10 Supplementation for Type 2 Diabetes Mellitus: A Systematic Review and Meta-Analysis
Source: Int J Endocrinol. 2018 Sep 16;2018:6484839. doi: 10.1155/2018/6484839 (PMC6165589; doi:10.1155/2018/6484839)
Supplement: Supplementary Materials — CRD42018088474.pdf is the protocol of this systematic review and meta-analysis; PRISMA 2009 checklist.doc is the PRISMA checklist. [file 6484839.f1.zip]

Archive with 2 entries (2 files):
- CRD42018088474.pdf
- PRISMA 2009 checklist.doc
